# Supplementary material for: Enhancing DNA-based nanodevices activation through cationic peptide acceleration of strand displacement
Source: Royal Society of Chemistry journal article supplement (doi:10.1039/d4nh00252k), 2024-01-01
Supplement: d4nh00252k1.pdf [file d4nh00252k1.pdf]

## Supporting Information

# Enhancing DNA-based Nanodevices Activation through Cationic Peptide Acceleration of Strand Displacement

Xianxue Zhang, Ruikai Du, Shichao Xu, Xinyue Wang and Zhen-Gang Wang \*

Table S1. Oligonucleotide sequences used in this work

| DNA                                     | Sequence (5'-3')                                                         |
|-----------------------------------------|--------------------------------------------------------------------------|
| 1                                       | Cy5-CAGATTGTGTACCTCAGTCGAAACC-BHQ2                                       |
| 2                                       | GCTTTAAGGTTTCGACTGAGGTACACAATCTG                                         |
| 3                                       | CAGATTGTGTACCTCAGTCGAAACCTTAAAGC                                         |
| 4                                       | AGGTTTCGACTGAGGTACACAATCTG                                               |
| 5                                       | CAGATTGTGTACCTCAGTCGAAACCT                                               |
| 6                                       | TAAGGTTTCGACTGAGGTACACAATCTG                                             |
| 7                                       | CAGATTGTGTACCTCAGTCGAAACCTTA                                             |
| 8                                       | CTTTAAGGTTTCGACTGAGGTACACAATCTG                                          |
| 9                                       | CAGATTGTGTACCTCAGTCGAAACCTTAAAG                                          |
| 10                                      | TGCTTTAAGGTTTCGACTGAGGTACACAATCTG                                        |
| 11                                      | CAGATTGTGTACCTCAGTCGAAACCTTAAAGCA                                        |
| input A                                 | CAAAACAAAACCTCATCTCATTCCACTCA                                            |
| input B                                 | CAAAACAAAACCTCATCTCACCCTAAAATCTCA                                        |
| gate A<br>(partially complementary)     | CACCACCAAACCTCATCTCAAAACAAAACCTCA<br>TGAGATGAGGTTTGTGTTGAGATG            |
| threshold<br>(partially complementary)  | CACCACCAAACCTCA<br>TGTTTGTAGATGAAGTTGGTGGTG                              |
| gate B<br>(partially complementary)     | CATAACACAATCACATCTCACCACCAAACCTCA<br>TGAGATGAAGTTGGTGGTGGATG             |
| fuel                                    | CAACATATCAATTCATCTCACCACCAAACCTCA                                        |
| reporter B<br>(partially complementary) | BHQ2-CATAACACAATCACA<br>TGAGATGTGATTGTGTTATG-Cy5                         |
| a                                       | Cy5-GCGGCAGAGCGACGCTCGGTCTG                                              |
| b                                       | AACTCAGACGACCATCTCCTAA-BHQ2                                              |
| c                                       | ACAGGCCGGGATTAGGAGATGGTCGTCTGAGTTTTTT<br>CGACCGAGCGTCTGCTGCCGCCAAGTGAATA |
| d                                       | TATTGCACTTGTCGGCCTGTTAAAGC                                               |
| e                                       | GCTTTAAACAGGCCGGGACAAGTGAATA                                             |

**Table S2. Peptides sequences used in this work**

| <b>Name</b> | <b>Sequence</b>                     |
|-------------|-------------------------------------|
| R5          | NH <sub>2</sub> -RRRRR-COOH         |
| R10         | NH <sub>2</sub> -RRRRRRRRR-COOH     |
| R15         | NH <sub>2</sub> -RRRRRRRRRRRRR-COOH |
| K10         | NH <sub>2</sub> -KKKKKKKKK-COOH     |
| R5K5        | NH <sub>2</sub> -RRRRRKKKK-COOH     |
| (RK)5       | NH <sub>2</sub> -RKRRKRKRK-COOH     |

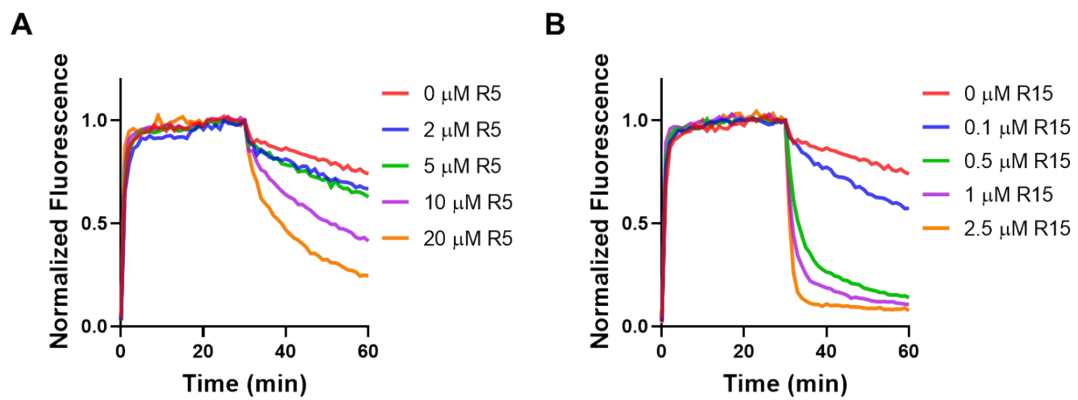

**Figure S1.** Effects of different concentrations of A) R5 and B) R15 on DNA strand displacement reaction. [DNA] = 1  $\mu\text{M}$ .

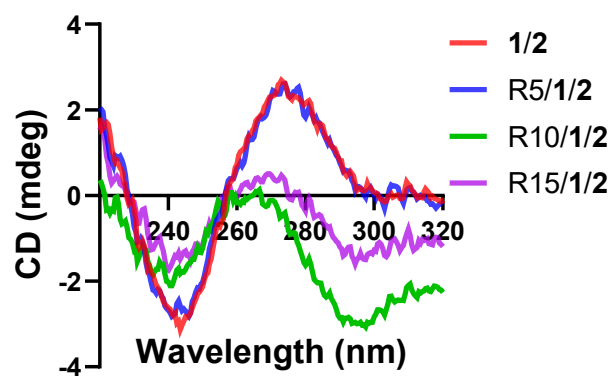

**Figure S2.** CD spectra of 1/2 in the presence of the R5, R10, or R15. [DNA] = 1  $\mu$ M. [peptides] = 5  $\mu$ M.

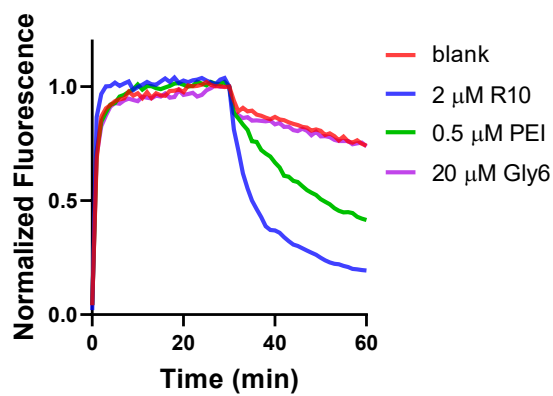

**Figure S3.** Effects of different concentrations of R10, PEI, and Gly6 on DNA strand displacement reaction. [DNA] = 1 μM.

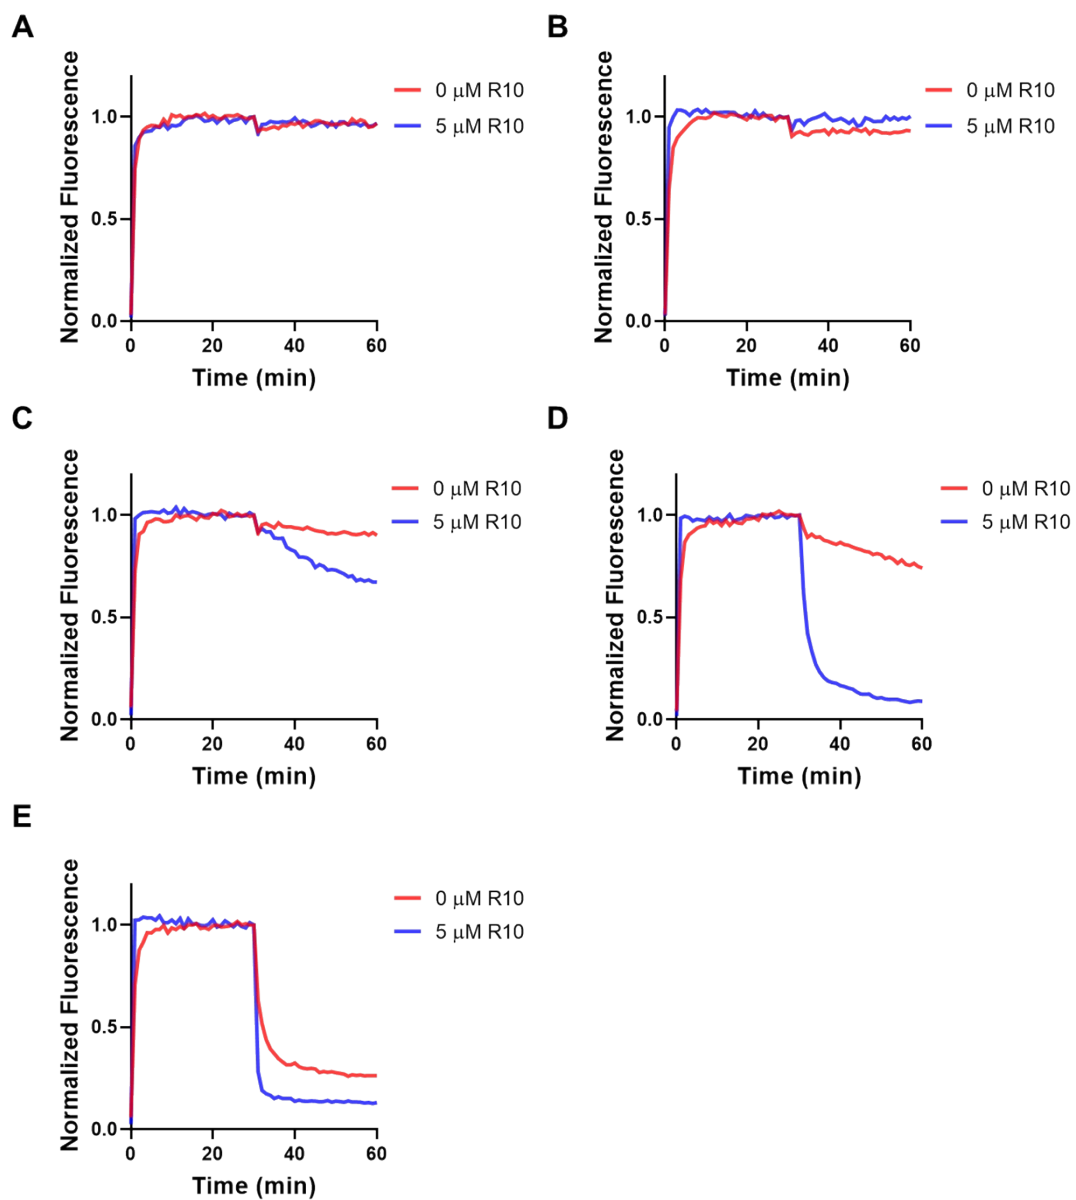

**Figure S4.** Effects of strand displacement reaction by R10 for different toehold length, A) 1 nt, B) 3 nt, C) 6 nt, D) 7 nt, E) 8nt. [DNA] = 1 μM.

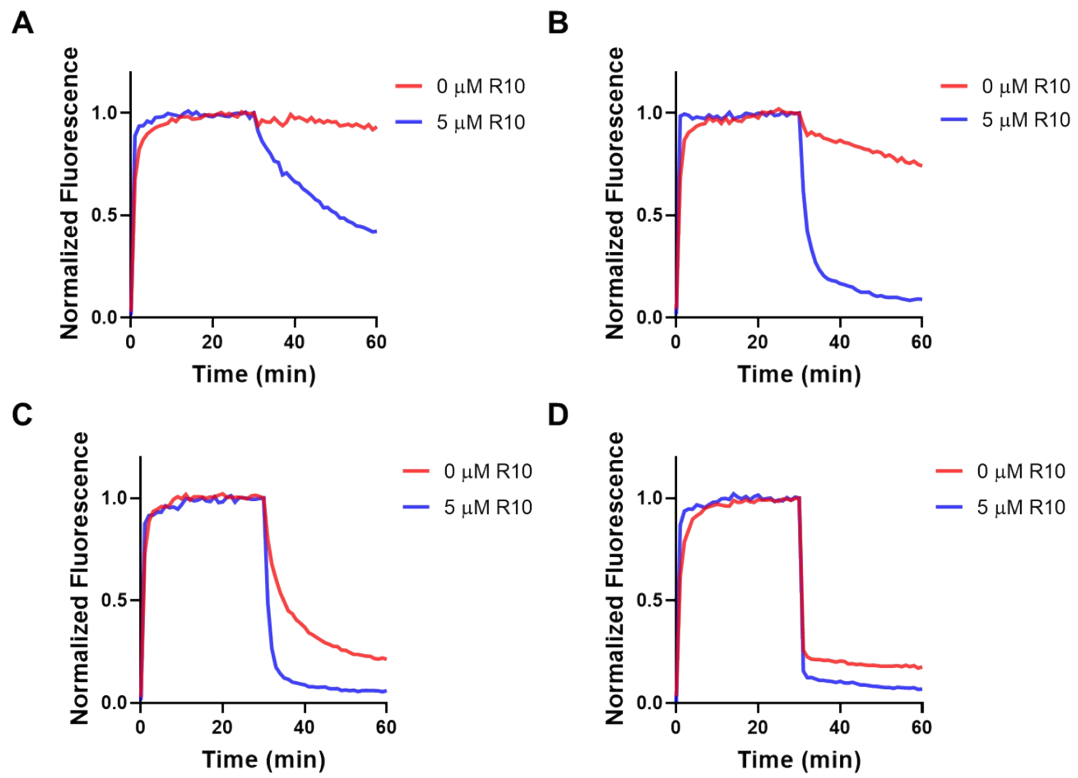

**Figure S5.** Effects of strand displacement reaction by R10 for different GC content in the toehold sequence, A) 0/7, B) 2/7, C) 4/7, D) 7/7. [DNA] = 1  $\mu$ M.

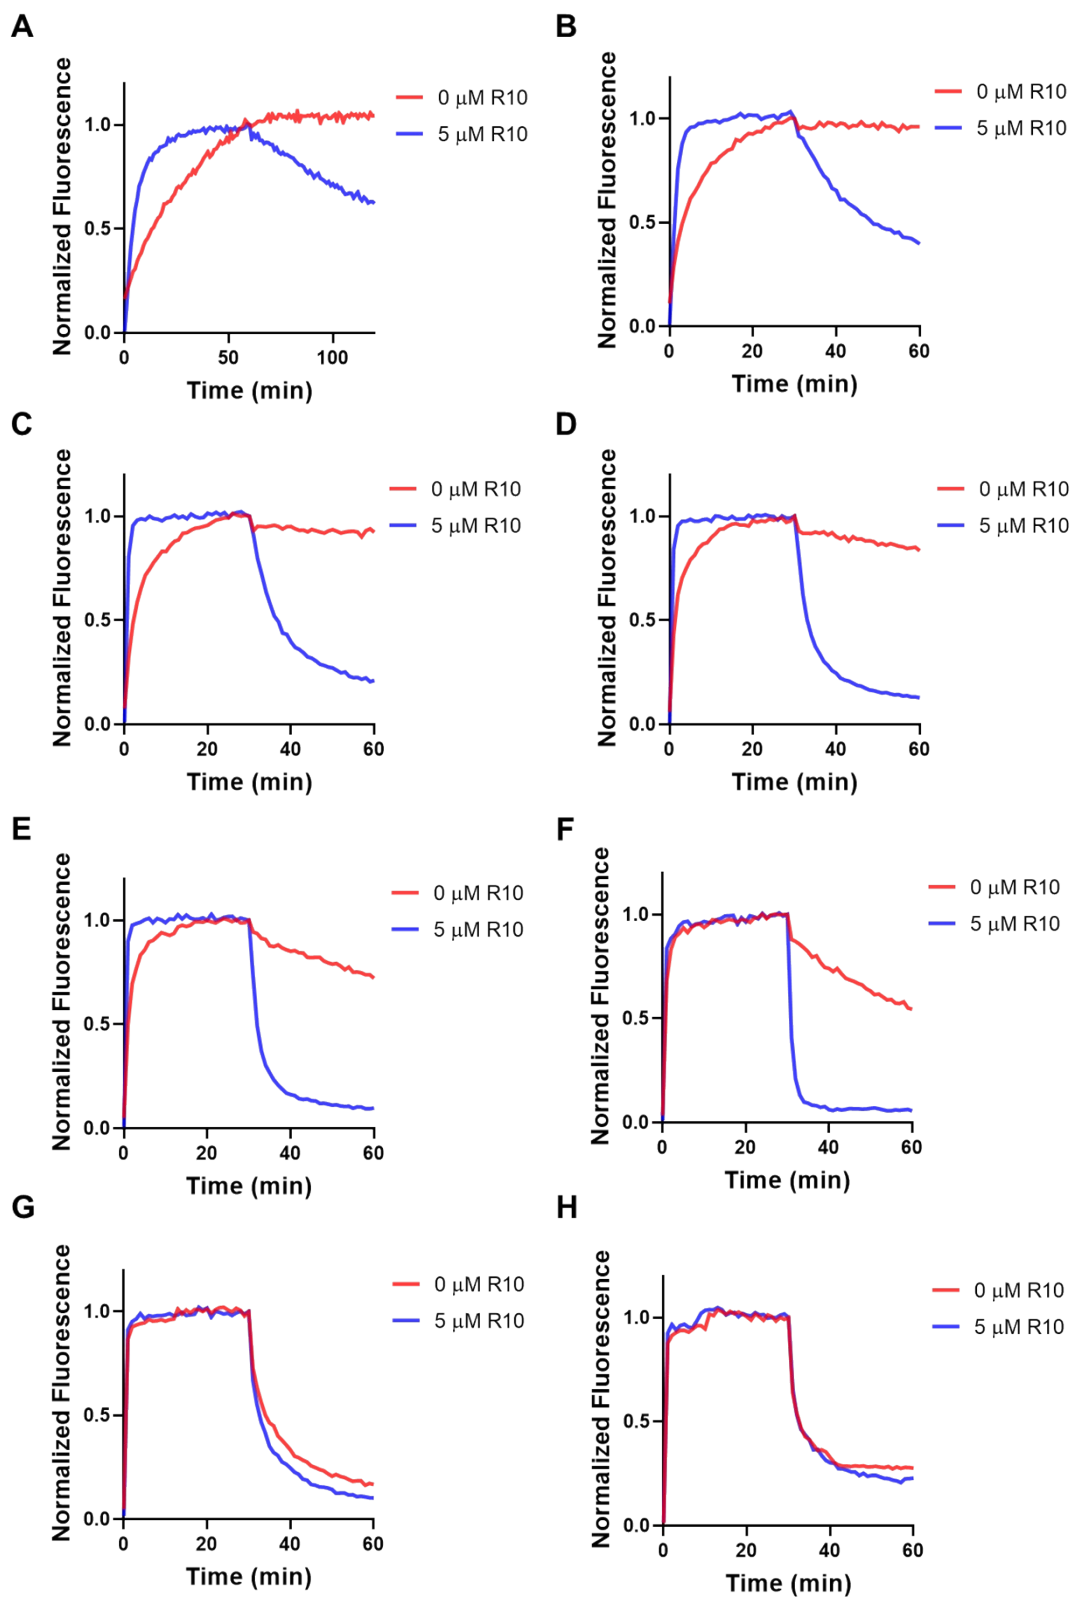

**Figure S6.** Effects of strand displacement reaction by R10 for different concentration of  $\text{Na}^+$ , A)  $[\text{Na}^+] = 10 \text{ mM}$ , B)  $[\text{Na}^+] = 20 \text{ mM}$ , C)  $[\text{Na}^+] = 30 \text{ mM}$ , D)  $[\text{Na}^+] = 40 \text{ mM}$ , E)  $[\text{Na}^+] = 50 \text{ mM}$ , F)  $[\text{Na}^+] = 100 \text{ mM}$ , G)  $[\text{Na}^+] = 500 \text{ mM}$ , H)  $[\text{Na}^+] = 1000 \text{ mM}$ .  $[\text{DNA}] = 1 \mu\text{M}$ .



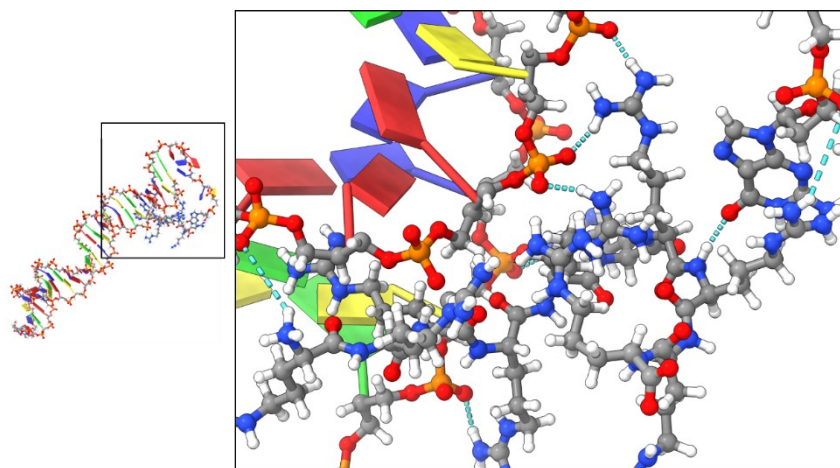

**Figure S7.** Representative structure of R10/DNA from the cluster analysis. The dotted line represents the electrostatic interaction of the guanidine group in R10 and the phosphate group in DNA.

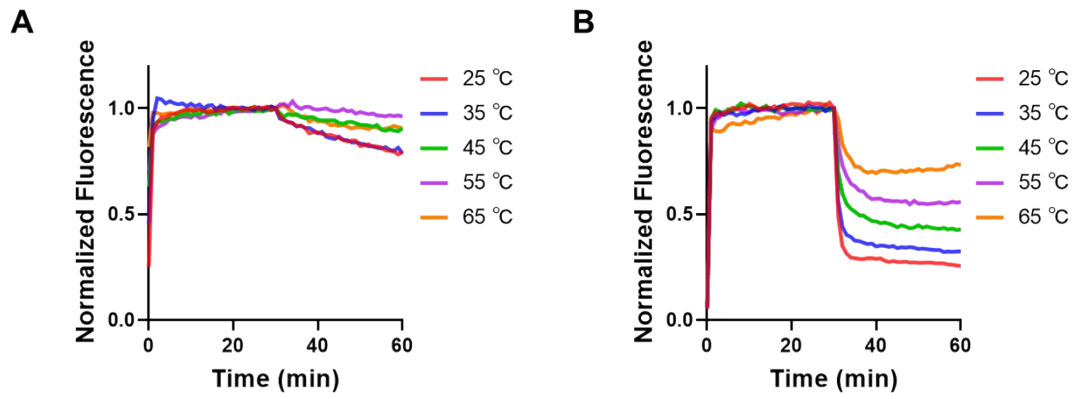

**Figure S8.** Effects of A) 0  $\mu\text{M}$  R10 and B) 5  $\mu\text{M}$  R10 on DNA strand displacement reaction at a range of temperatures.  $[\text{DNA}] = 1 \mu\text{M}$ .

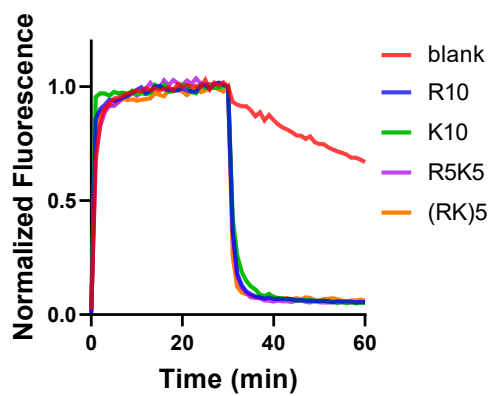

**Figure S9.** Effects of different cationic peptides on DNA strand displacement reaction. [DNA] = 1  $\mu$ M, [peptide] = 5  $\mu$ M.

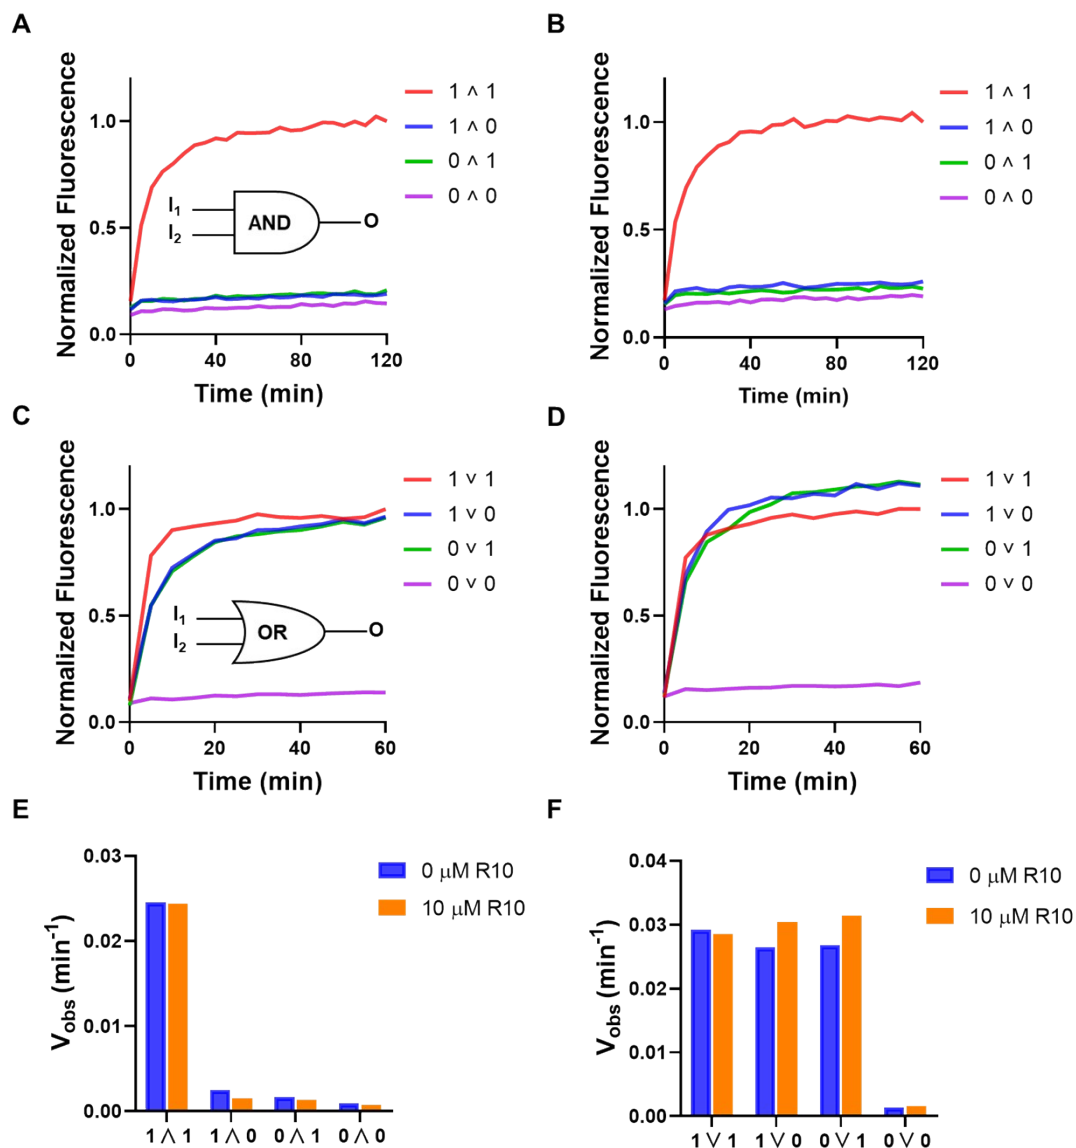

**Figure S10.** A-D) Output signal changes with time of A) AND gate and C) OR gate in the presence of R10 and of B) AND gate and D) OR gate in the absence of R10. The concentrations of gate A, gate B, fuel, and reporter B were 2 ×, 1 ×, 1 ×, 1.5 ×, respectively, with 1 × equal to 0.5 × 10<sup>-6</sup> M. Concentrations of input strands were at 0.1 × (0, logic off) or 0.9 × (1, logic on). E,F) V<sub>obs</sub> (taken from the first thirty minutes) of E) AND and F) OR gate by R10. Reactions were performed in 50 mM phosphate buffer (pH 7.0) containing 1 M NaCl.

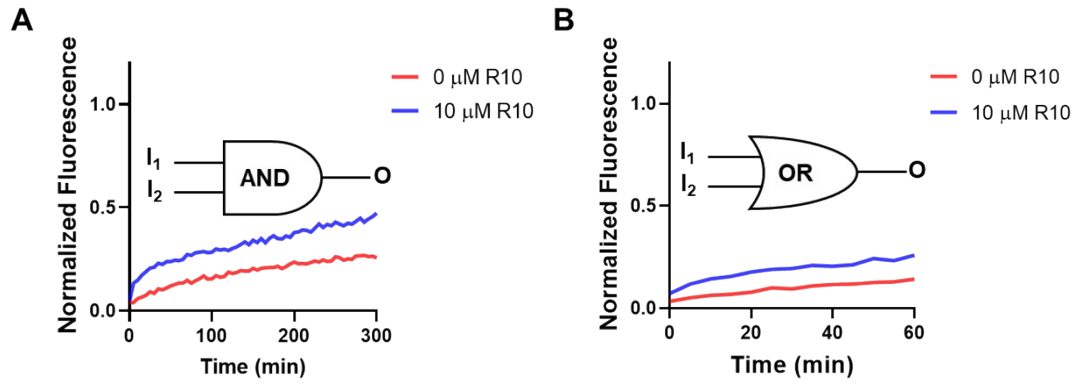

**Figure S11.** Time-dependent fluorescence signal changes for A) AND gate and B) OR gate in the absence and presence of R10. The concentrations of gate A, gate B, fuel, and reporter B were  $2 \times$ ,  $1 \times$ ,  $1 \times$ ,  $1.5 \times$ , respectively, with  $1 \times$  equal to  $0.5 \times 10^{-6}$  M. Concentrations of input strands were  $0 \times$ .
